# Supplementary material for: Droplet-microarray on superhydrophobic–superhydrophilic patterns for high-throughput live cell screenings
Source: Royal Society of Chemistry journal article supplement (doi:10.1039/c6ra06011k), 2016-01-01
Supplement: c6ra06011k1.pdf [file c6ra06011k1.pdf]

## Supplementary figures

### Droplet-Microarray on Superhydrophobic-superhydrophilic Patterns for High-throughput Live Cell Screenings

Anna A. Popova<sup>1</sup>, Konstantin Demir<sup>1</sup>, Titus Genisius Hartanto<sup>1</sup>, Eric Schmitt<sup>1</sup> and Pavel A. Levkin<sup>1\*</sup>

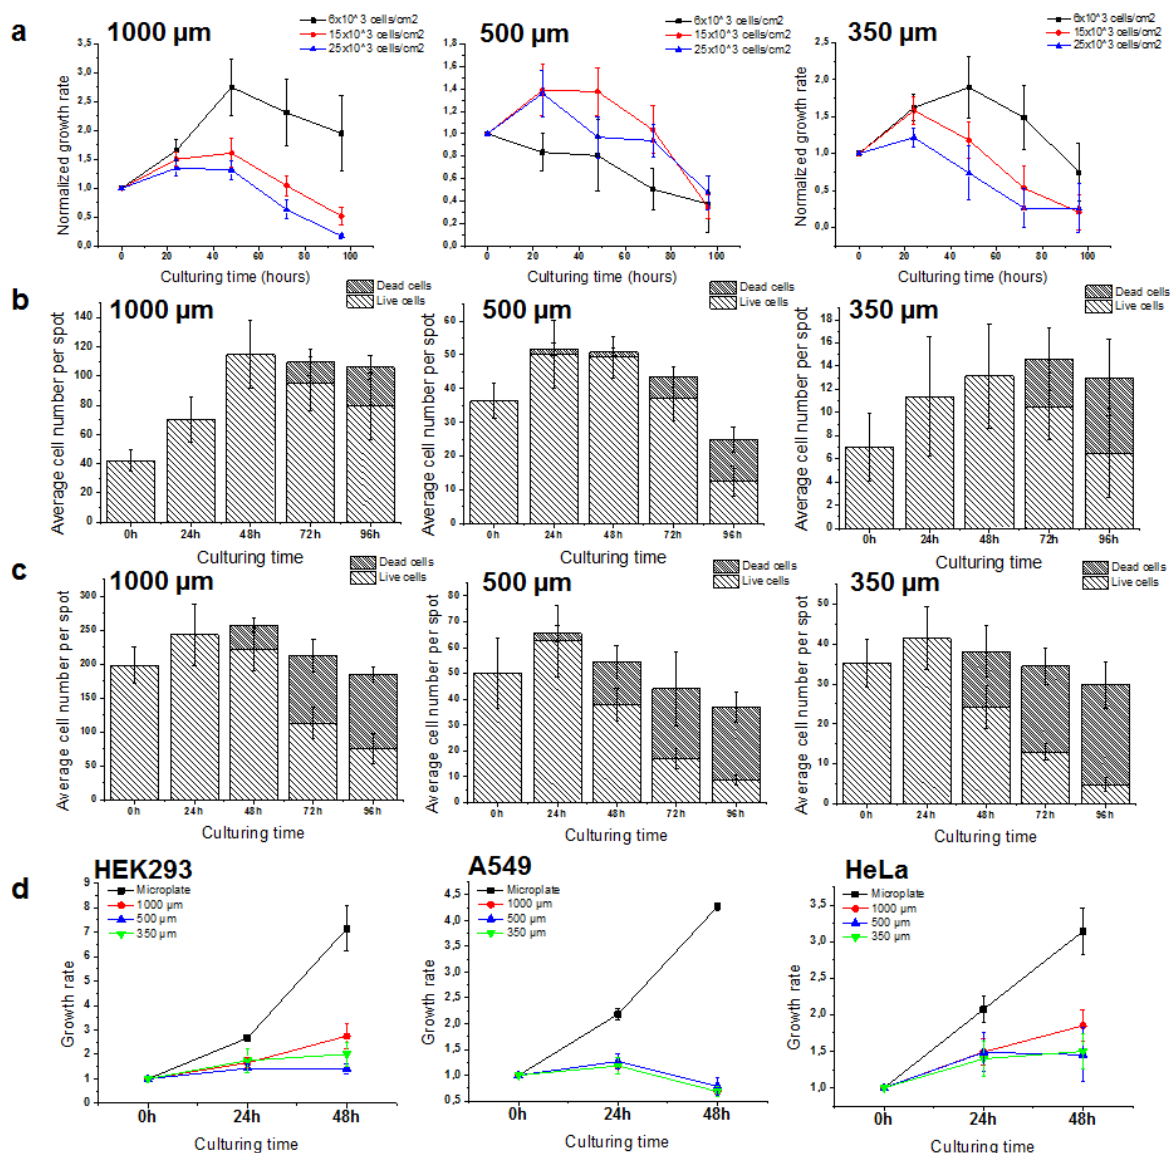

**e**

| HEK293     | 24h  | 48h  |
|------------|------|------|
| Microplate | 98%  | 97%  |
| 1000 mm    | 100% | 100% |
| 500 μm     | 97%  | 96%  |
| 350 μm     | 100% | 97%  |

| A549       | 24h | 48h |
|------------|-----|-----|
| Microplate | 97% | 96% |
| 1000 mm    | 98% | 64% |
| 500 μm     | 96% | 67% |
| 350 μm     | 99% | 64% |

| HeLa       | 24h | 48h |
|------------|-----|-----|
| Microplate | 99% | 98% |
| 1000 mm    | 97% | 94% |
| 500 μm     | 96% | 77% |
| 350 μm     | 97% | 84% |

Fig. S1. Growth rate and viability of HEK293, A549 and HeLa cells cultured using Droplet-Microarrays with different spot sizes with and without exchange of the medium. (a) Growth rates of HEK293 cells depending on the initial cell density (cell number per  $\text{cm}^2$ ). (b-c) Growth rate and viability of HEK293 (b) and A549 (c) cells cultured in individual droplets of different sizes for 5 days. (d) Comparison of growth rates of HEK293 (left), A549 (middle) and HeLa (right) on Droplet-Microarrays with different spot sizes and in 24-well microplate. (e) Tables showing comparison of viabilities of HE293 (left), A549 (middle) and HeLa (right) cells on DMA with different spot sizes and 24-well microplate at 24 and 48 hours after seeding.

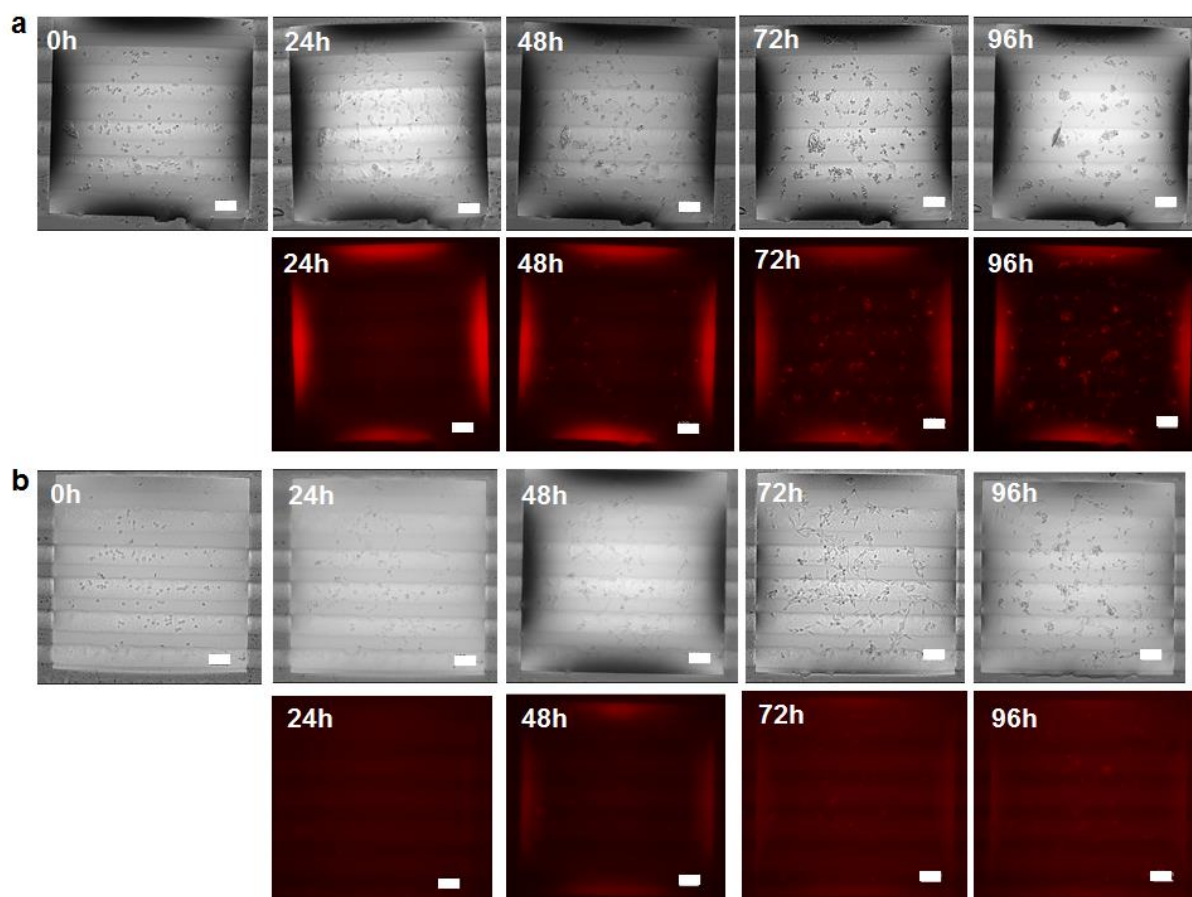

Fig. S2. Microscopic images of HeLa cells cultured on Droplet-Microarray with 1000  $\mu\text{m}$  spot sizes for 5 days without (a) and with (b) medium exchange.

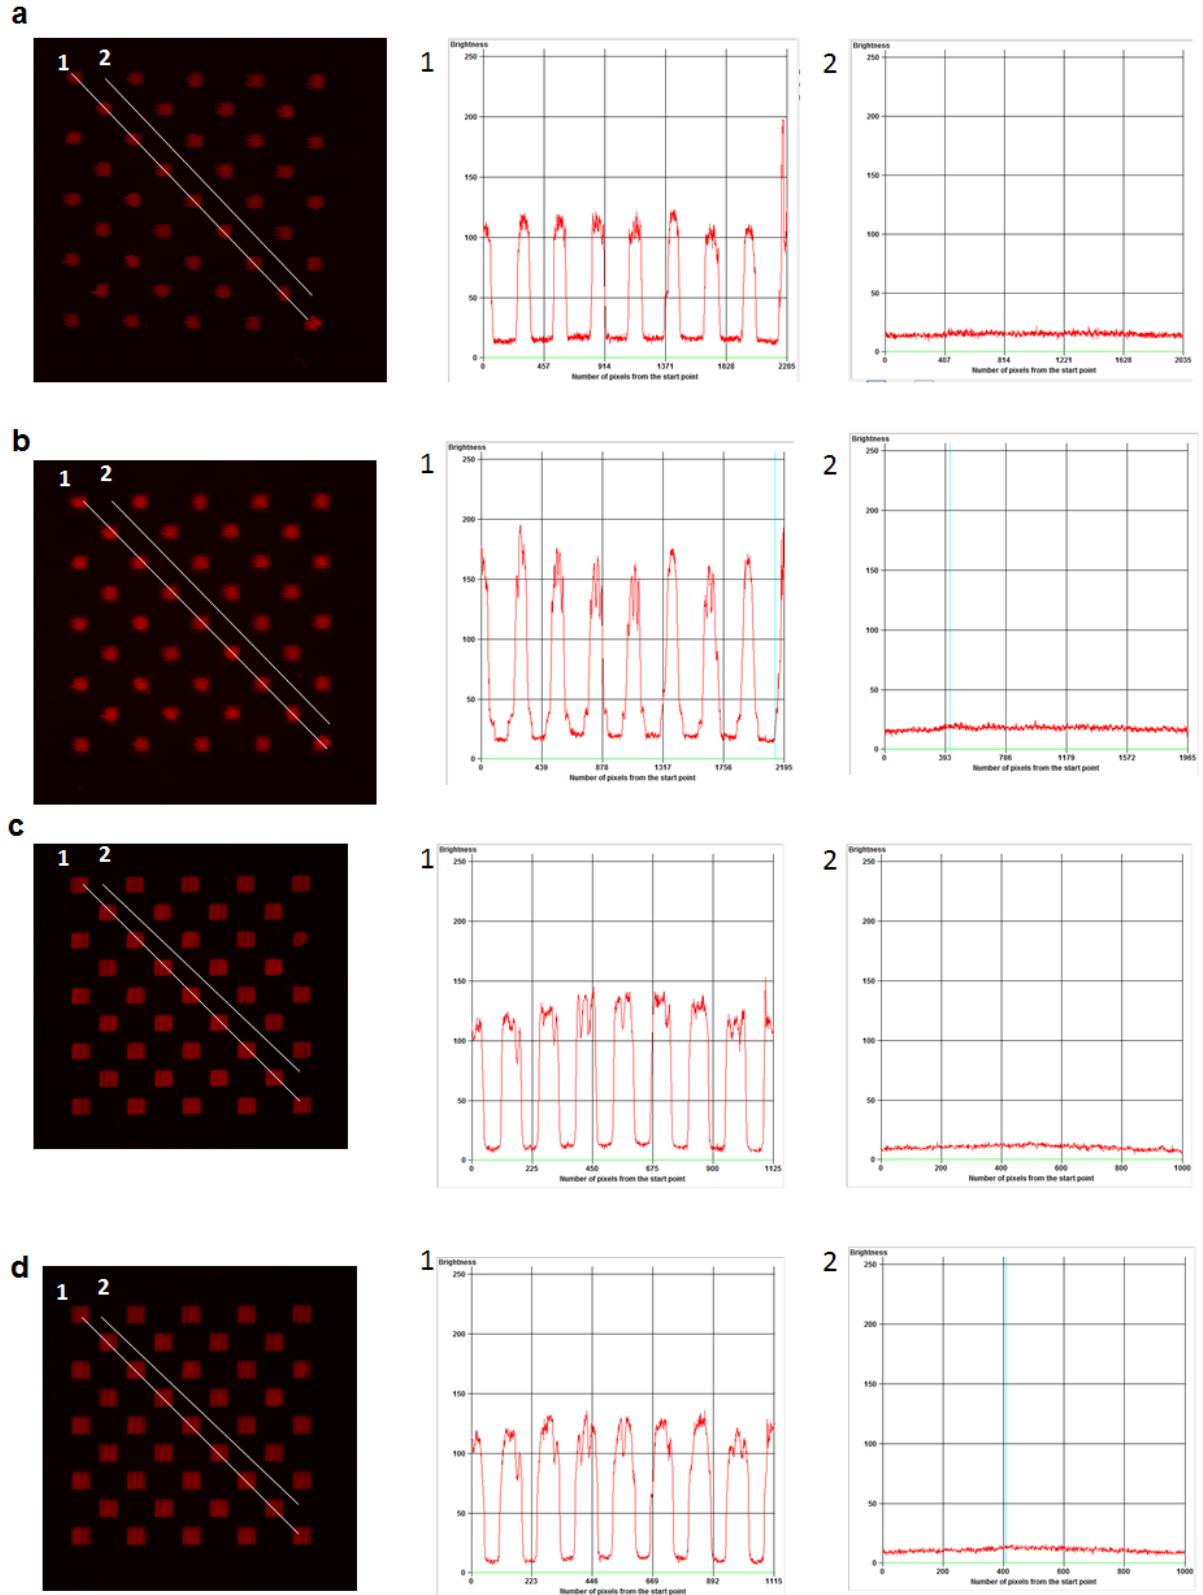

Fig. S3. Cross-contamination study. Microscopic images of DMA slides with spot sizes 1000  $\mu\text{m}$  (a-b) and 500  $\mu\text{m}$  (c-d) containing pre-printed doxorubicin in water solution (red) and fluorescence line profile of lines 1 and 2 indicated on the corresponding microscope image before DMA formation (a and c) and after DMA formation (b and d). Scale bar, 500  $\mu\text{m}$ .
